# Supplementary material for: Counter-Intuitive Magneto-Water-Wetting Effect to CO2 Adsorption at Room Temperature Using MgO/Mg(OH)2 Nanocomposites
Source: MDPI journal article supplement (doi:10.3390/ma15030983), 2022-01-27
Supplement: s1 [file s1]

## Article

# Counter-Intuitive Magneto-Water-Wetting Effect to CO<sub>2</sub> Adsorption at Room Temperature Using MgO/Mg(OH)<sub>2</sub> Nanocomposites

Hasanthi L. Senevirathna <sup>1</sup>, P. Vishakha T. Weerasinghe <sup>1</sup>, Li Xu <sup>2</sup>, Ming-Yan Tan <sup>2</sup>, Sang-Sub Kim <sup>3,\*</sup> and Ping Wu <sup>1,\*</sup>

<sup>1</sup> Entropic Interface Group, Engineering Product Development, Singapore University of Technology and Design, 8 Somapah Road, Singapore 487372, Singapore; hasanthi\_senevirathna@mymail.sutd.edu.sg (H.L.S.); puwakdandawe@mymail.sutd.edu.sg (P.V.T.W.)

<sup>2</sup> Institute of Materials Research and Engineering, Agency for Science, Technology and Research (A\*STAR), 2 Fusionopolis Way, Innovis, #08-03, Singapore 138634, Singapore; x-li@imre.a-star.edu.sg (L.X.); tanmy@imre.a-star.edu.sg (M.-Y.T.)

<sup>3</sup> Department of Materials Science and Engineering, Inha University, Incheon 22212, Korea

\* Correspondence: sangsub@inha.ac.kr (S.-S.K.); wuping@sutd.edu.sg (P.W.)

**Citation:** Senevirathna, H.L.; Weerasinghe, P.V.T.; Li, X.; Tan, M.-Y.; Kim, S.-S.; Wu, P. Counter Intuitive Magneto-Water-Wetting Effect to CO<sub>2</sub> Adsorption at Room Temperature Using MgO/Mg(OH)<sub>2</sub> Nano Composites. *Materials* **2022**, *15*, 983. <https://doi.org/10.3390/ma15030983>

Academic Editor: Paula Teixeira

Received: 20 December 2021

Accepted: 19 January 2022

Published: 27 January 2022

**Publisher's Note:** MDPI stays neutral with regard to jurisdictional claims in published maps and institutional affiliations.

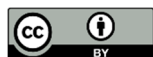

**Copyright:** © 2022 by the authors. Licensee MDPI, Basel, Switzerland. This article is an open access article distributed under the terms and conditions of the Creative Commons Attribution (CC BY) license (<https://creativecommons.org/licenses/by/4.0/>).

**Abstract:** MgO/Mg(OH)<sub>2</sub>-based materials have been intensively explored for CO<sub>2</sub> adsorption due to their high theoretical but low practical CO<sub>2</sub> capture efficiency. Our previous study on the effect of H<sub>2</sub>O wetting on CO<sub>2</sub> adsorption in MgO/Mg(OH)<sub>2</sub> nanostructures found that the presence of H<sub>2</sub>O molecules significantly increases (decreases) CO<sub>2</sub> adsorption on the MgO (Mg(OH)<sub>2</sub>) surface. Furthermore, the magneto-water-wetting technique is used to improve the CO<sub>2</sub> capture efficiency of various nanofluids by increasing the mass transfer efficiency of nanobeads. However, the influence of magneto-wetting to the CO<sub>2</sub> adsorption at nanobead surfaces remains unknown. The effect of magneto-water-wetting on CO<sub>2</sub> adsorption on MgO/Mg(OH)<sub>2</sub> nanocomposites was investigated experimentally in this study. Contrary to popular belief, magneto-water-wetting does not always increase CO<sub>2</sub> adsorption; in fact, if Mg(OH)<sub>2</sub> dominates in the nanocomposite, it can actually decrease CO<sub>2</sub> adsorption. As a result of our structural research, we hypothesized that the creation of a thin H<sub>2</sub>O layer between nanograins prevents CO<sub>2</sub> from flowing through, hence slowing down CO<sub>2</sub> adsorption during the carbon-hydration aging process. Finally, the magneto-water-wetting technique can be used to control the carbon-hydration process and uncover both novel insights and discoveries of CO<sub>2</sub> capture from air at room temperature to guide the design and development of ferrofluid devices for biomedical and energy applications.

**Keywords:** room temperature; CO<sub>2</sub> adsorption; magneto-wetting; nesquehonite; aging

## Supplement Materials

TGA analysis was done by loading 6–7 mg to a platinum pan in the TGA unit, for CO<sub>2</sub> adsorption performance measurement. To avoid errors caused by pre-adsorbed species as atmospheric CO<sub>2</sub>, water, and other impurities, samples were first pre-treated at 150 °C for 60 min under a flow of high purity N<sub>2</sub> (40 mL min<sup>−1</sup>) with a ramp rate of 10 °C min<sup>−1</sup>. The temperature was then lowered to the desired adsorption temperature at a rate of 10 °C min<sup>−1</sup>, the gas was switched from N<sub>2</sub> to CO<sub>2</sub> with a constant flow of high purity CO<sub>2</sub> (1 atm, 40 mL min<sup>−1</sup>), and the CO<sub>2</sub> adsorption uptake was measured for 90 min.

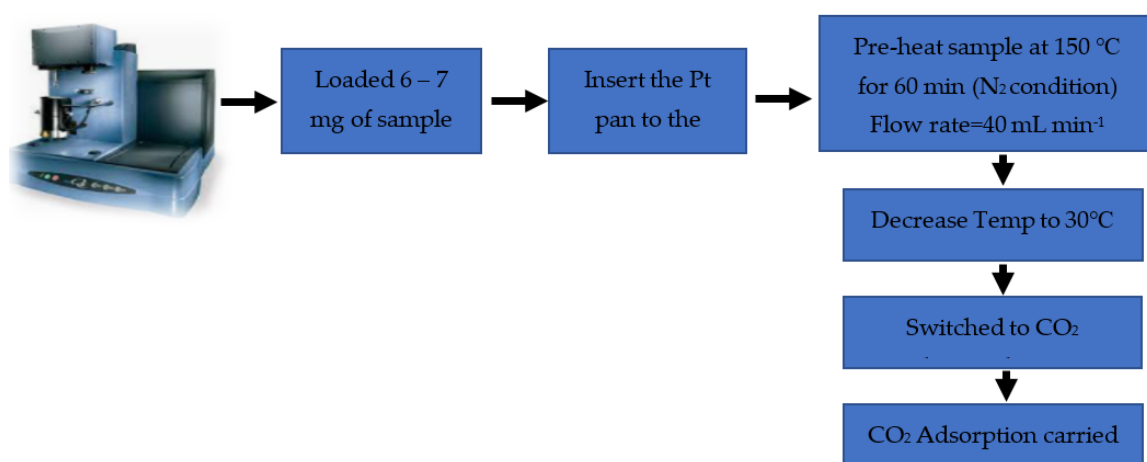

**Figure S1.** A schematic diagram of the TGA analysis process for the CO<sub>2</sub> capture capacity of the samples and figure of TGA Q50 analyser [1].

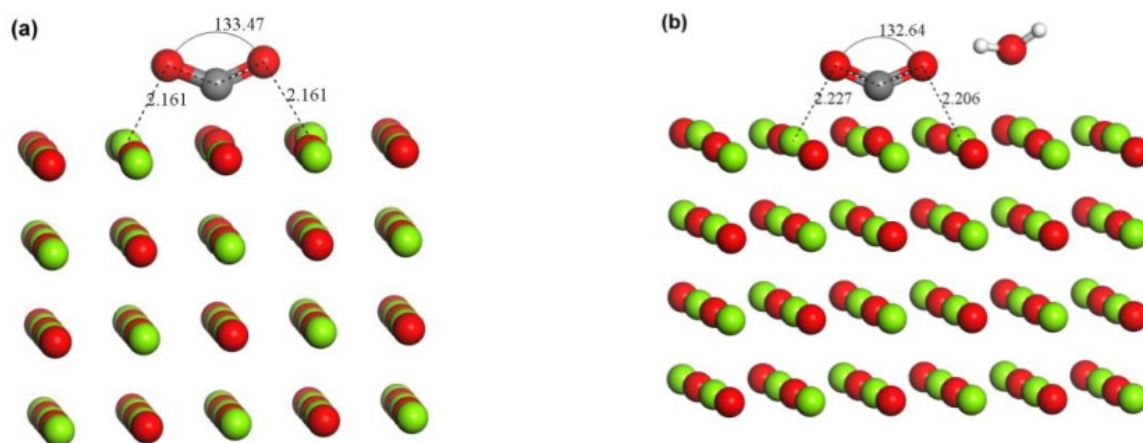

**Figure S2.** Optimized configuration of adsorbed CO<sub>2</sub> on MgO surface (a) and with H<sub>2</sub>O (b). Atoms are shown as colored balls: hydrogen (white), oxygen (red), magnesium (green), and carbon (grey).

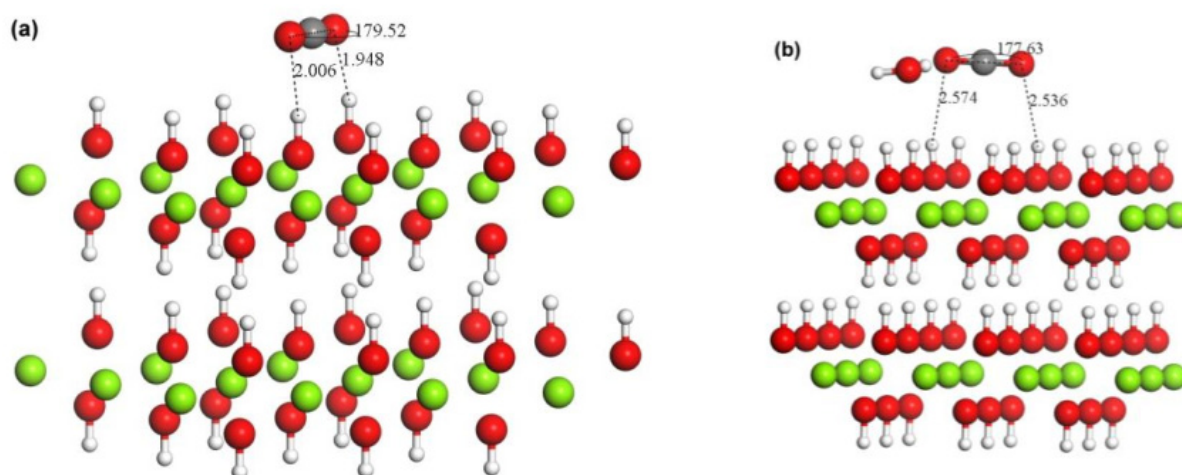

**Figure S3.** Optimized configuration of adsorbed CO<sub>2</sub> on Mg(OH)<sub>2</sub> surface (a) and with H<sub>2</sub>O (b). Atoms are shown as colored balls: hydrogen (white), oxygen (red), magnesium (green), and carbon (grey).

---

## Reference

1. TA Instruments. TA instruments thermogravimetric analyzers. Available online: [http://www.tainstruments.com/pdf/literature/OLD\\_tgabrochure.pdf](http://www.tainstruments.com/pdf/literature/OLD_tgabrochure.pdf) (accessed on 5 January 2022).
